# Supplementary material
Source: Springer Nature journal article supplement (https://www.springermedizin.de/resource/supplementary/12916_2006_96_MOESM4_ESM.pdf/9599160)
Supplement: MOESM4 [file 9599160]

# Control graph

Illustration B: Incident DALY Rates per 1,000 Population by Mental Disorder, Age and Sex, Victoria 1996

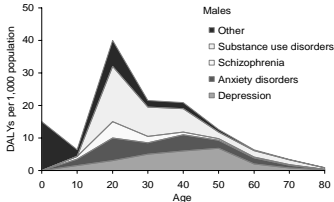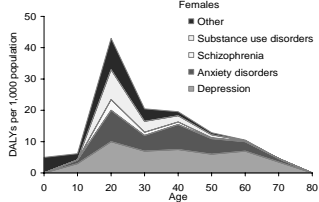

# Intervention graph

Illustration B: Incident DALY Rates per 1,000 Population by Mental Disorder, Age and Sex, Victoria 1996

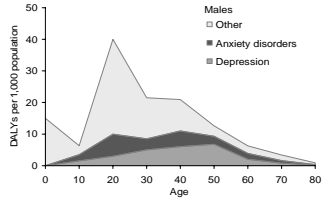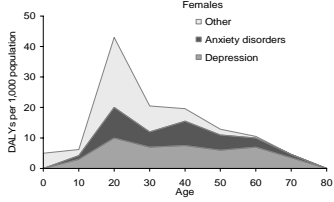

Note: The thickness of the shaded layer = DALYs per 1,000 population for that disorder
